# Supplementary material
Source: publisher figshare collection journal article supplement (https://asha.figshare.com/articles/dataset/_/21291345)
Supplement: Supplementary file 1 [file 1]

**Supplemental Material S3.** Participant demographic information by treatment category.

| Study                                            | Number of Participants<br>(Experimental/<br>Control) | Time-Post Onset           | Aphasia Type<br>(Experimental/<br>Control)                | Aphasia<br>Severity | Auditory<br>Comprehension<br>Severity |
|--------------------------------------------------|------------------------------------------------------|---------------------------|-----------------------------------------------------------|---------------------|---------------------------------------|
| <b>Direct Auditory Treatments (<i>n</i> = 7)</b> |                                                      |                           |                                                           |                     |                                       |
| Davidoff & Katz (1985)                           | 8                                                    | 1.5 to 24 years           | Not reported                                              | Mild–moderate       | Not reported                          |
| Haendiges et al. (1996)                          | 1                                                    | > 1 year                  | Broca's                                                   | Not reported        | Good–poor                             |
| Knollman-Porter et al. (2018)                    | 2                                                    | 15 months<br>65 months    | Wernicke's (1)<br>Global (1)                              | Moderate–<br>severe | Severe                                |
| Mitchum et al. (1995)                            | 1                                                    | Not reported              | Wernicke's                                                | Not reported        | Not reported                          |
| Morris & Franklin (2012)                         | 2                                                    | 14 months<br>16 months    | Not reported                                              | Not reported        | Not reported                          |
| Musso et al. (1999)                              | 24 (20/4)                                            | 6 to 18 months            | Wernicke's (20)/<br>Did not have<br>aphasia (4)           | Not reported        | Not reported                          |
| Woolf et al. (2014)                              | 8                                                    | 7 months to<br>68 months  | Not reported                                              | Not reported        | Moderate–<br>severe                   |
| <b>Mixed Auditory Treatments (<i>n</i> = 13)</b> |                                                      |                           |                                                           |                     |                                       |
| Archibald et al. (2009)                          | 8                                                    | 7 months to<br>12.5 years | Anomic (3)<br>Broca's (2)<br>Conduction (2)<br>Global (1) | Not reported        | Not reported                          |
| Behrmann & Lieberthal (1989)                     | 1                                                    | Not reported              | Global                                                    | Not reported        | Not reported                          |
| Francis et al. (2001)                            | 1                                                    | 4 years                   | Not reported                                              | Not reported        | Poor                                  |
| Grayson et al. (1997)                            | 1                                                    | 4–7 weeks;<br>17–34 years | Jargon aphasia                                            | Not reported        | Poor                                  |
| Jacobs & Thompson (2000)                         | 4 (2/2)                                              | 27 to 198 months          | Broca's (2/2)                                             | Not reported        | Not reported                          |
| MacGregor et al. (2015)                          | 12                                                   | 17 to 234 months          | Nonfluent (12)                                            | Mild–moderate       | Not reported                          |
| Maneta et al. (2001)                             | 1                                                    | 5 years                   | Not reported                                              | Severe              | Poor                                  |
| Munro & Siyamblapitiya (2017)                    | 1                                                    | 1 year<br>8 months        | Global                                                    | Severe              | Severe                                |

|                                           |            |                      |                                                            |                 |               |
|-------------------------------------------|------------|----------------------|------------------------------------------------------------|-----------------|---------------|
| Prins et al. (1989)                       | 32 (10/22) | 3 months to 17 years | Nonfluent (4/14)<br>Fluent (3/7)<br>Mixed (3/1)            | Not reported    | Not reported  |
| Raymer et al. (2006)                      | 2          | 20 months; 22 months | Mixed<br>Transcortical (1)<br>Broca's (1)                  | Not reported    | Severe        |
| Schwartz et al. (1994)                    | 8          | 1.5 to 17 years      | Agrammatic (8)                                             | Moderate–severe | Not reported  |
| Thompson et al. (2010)                    | 6          | 6 to 146 months      | Agrammatic (6)                                             | Mild–moderate   | Not reported  |
| Thompson et al. (2003)                    | 4          | 1 to 11 years        | Broca's (4)                                                | Not reported    | Not reported  |
| <b>Indirect Treatments (<i>n</i> = 8)</b> |            |                      |                                                            |                 |               |
| Bonakdarpour et al. (2003)                | 7          | 14 to 58 months      | Broca's (5)<br>Subcortical (2)                             | Not reported    | Moderate–good |
| Francis et al. (2003)                     | 1          | Not reported         | Not reported                                               | Not reported    | Not reported  |
| Javadipour et al. (2018)                  | 3          | 20 to 48 months      | Not reported                                               | Mild–moderate   | Not reported  |
| Murray et al. (2006)                      | 1          | 4 years 2 months     | Conduction                                                 | Mild            | Mild          |
| Szelag et al. (2014)                      | 18 (11/7)  | 5 to 40 weeks        | Not reported                                               | Not reported    | Not reported  |
| Szymaszek et al. (2017)                   | 14 (7/7)   | 5 to 31 weeks        | Fluent (7/7)                                               | Mild–moderate   | Not reported  |
| You et al. (2011)                         | 21 (14/7)  | 16 to 38 months      | Not reported                                               | Not reported    | Not reported  |
| Zakarias (2018)                           | 8 (3/5)    | 8 to 240 months      | Transcortical motor (2/2)<br>Anomic (1/2)<br>Broca's (0/1) | Not reported    | Not reported  |
