# Supplementary material
Source: publisher figshare collection journal article supplement (https://asha.figshare.com/articles/dataset/_/21291345)
Supplement: Supplementary file 2 [file 1]

**Supplemental Material S4.** Treatment delivery schedule by treatment category.

| Study                                            | Treatment Frequency<br>(Number of Sessions Per Week) | Session Length    | Total Number of Treatment Sessions | Duration of Treatment |
|--------------------------------------------------|------------------------------------------------------|-------------------|------------------------------------|-----------------------|
| <b>Direct Auditory Treatments (<i>n</i> = 7)</b> |                                                      |                   |                                    |                       |
| Davidoff & Katz (1985)                           | 3–6                                                  | 10–15 minutes     | 60                                 | 3 months              |
| Haendiges et al. (1996)                          | 2                                                    | 2 hours           | 17                                 | 8.5 weeks             |
| Knollman-Porter et al. (2018)                    | 5                                                    | 2 hours           | 20                                 | 4 weeks               |
| Mitchum et al. (1995)                            | Not reported                                         | Not reported      | 13                                 | Not reported          |
| Morris & Franklin (2012)                         | 2                                                    | 40–60 minutes     | 12                                 | Not reported          |
| Musso et al. (1999)                              | Not reported                                         | 8 minutes         | 11                                 | Not reported          |
| Woolf et al. (2014)                              | 2                                                    | 1 hour            | 24                                 | 12 weeks              |
| <b>Mixed Auditory Treatments (<i>n</i> = 13)</b> |                                                      |                   |                                    |                       |
| Archibald et al. (2009)                          | At least 1                                           | Not reported      | Not reported                       | 15 weeks              |
| Behrmann & Lieberthal (1989)                     | Not reported                                         | 1 hour            | 15                                 | 6 weeks               |
| Francis et al. (2001)                            | Not reported                                         | Not reported      | Not reported                       | 6 weeks               |
| Grayson et al. (1997)                            | 3–5                                                  | 15 minutes–1 hour | Not reported                       | 3–4 weeks             |
| Jacobs & Thompson (2000)                         | 2–3                                                  | 1–1.5 hours       | 13–19                              | 7–10 weeks            |
| MacGregor et al. (2015)                          | 5                                                    | 180–240 minutes   | 10                                 | 2 weeks               |
| Maneta et al. (2001)                             | Not reported                                         | 30 minutes        | 12                                 | 6 weeks               |
| Munro & Siyamblapitiya (2017)                    | 5                                                    | 60 minutes        | 10                                 | 2 weeks               |
| Prins et al. (1989)                              | 2                                                    | Not reported      | Not reported                       | 20 weeks              |
| Raymer et al. (2006)                             | 1–4                                                  | Not reported      | Not reported                       | Not reported          |
| Schwartz et al. (1994)                           | 3                                                    | 60–90 minutes     | 15–28                              | Maximum 4 months      |
| Thompson et al. (2010)                           | 2                                                    | 2 hours           | Maximum 20                         | 4–7 weeks             |
| Thompson et al. (2003)                           | 2                                                    | 2 hours           | Not reported                       | Not reported          |
| <b>Indirect Treatments (<i>n</i> = 8)</b>        |                                                      |                   |                                    |                       |
| Bonakdarpour et al. (2003)                       | 3–4                                                  | Not reported      | 15                                 | 1 month               |
| Francis et al. (2003)                            | 5                                                    | Not reported      | Not reported                       | 17 weeks              |
| Javadipour et al. (2018)                         | 3                                                    | 40–45 minutes     | 18                                 | 6 weeks               |

|                         |     |            |              |              |
|-------------------------|-----|------------|--------------|--------------|
| Murray et al. (2006)    | 1   | 60 minutes | Not reported | Not reported |
| Szelag et al. (2014)    | 3   | 45 minutes | 8            | 3 weeks      |
| Szymaszek et al. (2017) | 3   | 45 minutes | 8            | Not reported |
| You et al. (2011)       | 5   | 30 minutes | 10           | 2 weeks      |
| Zakarias (2018)         | 3–4 | 20 minutes | 13           | 4 weeks      |
