# Supplementary material
Source: publisher figshare collection journal article supplement (https://asha.figshare.com/articles/dataset/_/21291345)
Supplement: Supplementary file 3 [file 1]

**Supplemental Material S2.** Study parameters by treatment category.

| Study                                            | Stated Purpose of the Study                                                                                                                                                                       | Auditory Comprehension Treatment Target | Study Design   | Experimental Control (Condition or Group) |
|--------------------------------------------------|---------------------------------------------------------------------------------------------------------------------------------------------------------------------------------------------------|-----------------------------------------|----------------|-------------------------------------------|
| <b>Direct Auditory Treatments (<i>n</i> = 7)</b> |                                                                                                                                                                                                   |                                         |                |                                           |
| Davidoff & Katz (1985)                           | Improve attention and understanding of verbal messages over the telephone                                                                                                                         | Sentence                                | Group Study    | No                                        |
| Haendiges et al. (1996)                          | Improve comprehension of semantically reversible sentences                                                                                                                                        | Sentence                                | Case Study     | No                                        |
| Knollman-Porter et al. (2018)                    | Examine feasibility and influence of high-intensity word-picture verification treatment on word comprehension                                                                                     | Word                                    | Single-Subject | No                                        |
| Mitchum et al. (1995)                            | Examine thematic mapping treatment on comprehension of reversible sentences                                                                                                                       | Sentence                                | Case Study     | Yes (Condition)                           |
| Morris & Franklin (2012)                         | Examine effect of semantic treatment on comprehension                                                                                                                                             | Word                                    | Single Subject | No                                        |
| Musso et al. (1999)                              | Determine which brain area mediates recovery of auditory comprehension                                                                                                                            | Word & Sentence                         | Group Study    | Yes (Condition)                           |
| Woolf et al. (2014)                              | Determine if two forms of discrimination therapy for auditory processing impairment can improve speech perceptions and/or help participants use semantic information to compensate for impairment | Word                                    | Group Study    | No                                        |
| <b>Mixed Auditory Treatments (<i>n</i> = 13)</b> |                                                                                                                                                                                                   |                                         |                |                                           |
| Archibald et al. (2009)                          | Determine the influence of AphasiaMate on word comprehension and retrieval when added to their existing therapy program                                                                           | Word                                    | Group Study    | No                                        |
| Behrmann & Lieberthal (1989)                     | Determine the influence of a semantic rehabilitation program using visual and verbal semantics                                                                                                    | Word                                    | Case Study     | Yes (Condition)                           |
| Francis et al. (2001)                            | Contrast effects of implicit and explicit auditory treatment on access to semantic knowledge                                                                                                      | Word                                    | Single-Subject | Yes (Condition)                           |
| Grayson et al. (1997)                            | Determine effect of semantic therapy and semantic plus auditory therapy on comprehension in aphasia                                                                                               | Word & Sentence                         | Single-Subject | Yes (Condition)                           |
| Jacobs & Thompson (2000)                         | Examine the relationship between sentence comprehension and expression                                                                                                                            | Sentence                                | Single-Subject | Yes (Condition)                           |
| MacGregor et al. (2015)                          | Investigate the spatiotemporal dynamics of rapid automatic lexical processing in aphasia before and after intensive language aphasia treatment                                                    | Word & Sentence                         | Group Study    | No                                        |
| Maneta et al. (2001)                             | Improve discrimination skills                                                                                                                                                                     | Word                                    | Case Study     | No                                        |
| Munro & Siyamblapitiya                           | Examine effect of semantic therapy on comprehension                                                                                                                                               | Word                                    | Single-        | No                                        |

| (2017)                                          |                                                                                                                                                             |                                     | Subject                  |                         |
|-------------------------------------------------|-------------------------------------------------------------------------------------------------------------------------------------------------------------|-------------------------------------|--------------------------|-------------------------|
| Prins et al. (1989)                             | Evaluate effectiveness of a systematic auditory comprehension treatment program compared to general language treatment or no treatment                      | Word & Sentence                     | Group Study              | Yes (Condition & Group) |
| Raymer et al. (2006)                            | Investigate effect of multi-mode matching exercises on improving word comprehension and retrieval                                                           | Word                                | Single-Subject           | No                      |
| Schwartz et al. (1994)                          | Examine effects of a training program that encourages explicit analysis of the verb-noun relational structure in canonical and non-canonical sentence types | Sentence                            | Group Study              | Yes (Condition)         |
| Thompson et al. (2010)                          | Examine patterns of neural activation associated with treatment induced improvements of complex sent production and comprehension                           | Sentence                            | Single-Subject           | Yes (Condition)         |
| Thompson et al. (2003)                          | Determine if training production of syntactically complex sentences would generalize to less complex sentences                                              | Sentence                            | Single-Subject           | No                      |
| <b>Indirect Treatments (<math>n = 8</math>)</b> |                                                                                                                                                             |                                     |                          |                         |
| Bonakdarpour et al. (2003)                      | Determine effect of MIT on verbal production and auditory comprehension                                                                                     | Verbal Production                   | Group Study              | Yes (Condition)         |
| Francis et al. (2003)                           | Determine if improving short-term/working memory would improve sentence comprehension                                                                       | Sentence Repetition                 | Case Study               | Yes (Condition)         |
| Javadipour et al. (2018)                        | Explore impact of visual attention training on auditory comprehension abilities                                                                             | Attention                           | Single-Subject           | No                      |
| Murray et al. (2006)                            | Examine whether attention training would improve attn and auditory comprehension                                                                            | Attention                           | Single-Subject           | No                      |
| Szelag et al. (2014)                            | Improve auditory comprehension following training in the perception of temporal order of events (monaural presentation)                                     | Auditory Processing                 | Randomized Control Study | Yes (Group)             |
| Szymaszek et al. (2017)                         | Improve auditory comprehension following training in the perception of temporal order of events (binaural presentation)                                     | Auditory Processing                 | Group Study              | Yes (Group)             |
| You et al. (2011)                               | Investigate the effect of transcranial direct current stimulation on comprehension                                                                          | Auditory Comprehension              | Randomized Control Study | Yes (Group)             |
| Zakarias et al. (2018)                          | Investigate whether a combined working memory and executive function training improved comprehension spoken sentences                                       | Working Memory & Executive Function | Group Study              | Yes (Group)             |
