# Supplementary material
Source: publisher figshare collection journal article supplement (https://asha.figshare.com/articles/dataset/_/21291345)
Supplement: Supplementary file 5 [file 1]

**Supplemental Material S5.** Treatment outcomes and generalization by treatment category.

| Treatment Response                               |         |              | Generalization           |              |                           |              |                             |              |                                  |                             |
|--------------------------------------------------|---------|--------------|--------------------------|--------------|---------------------------|--------------|-----------------------------|--------------|----------------------------------|-----------------------------|
| <i>Trained Stimuli</i>                           |         |              | <i>Untrained Stimuli</i> |              | <i>Formal AC Measures</i> |              | <i>Informal AC Measures</i> |              | <i>Other Linguistic Measures</i> |                             |
| Study                                            | Improve | Pos Sig      | Improve                  | Pos Sig      | Improve                   | Pos Sig      | Improve                     | Pos Sig      | Improve                          | Pos Sig                     |
| <b>Direct Auditory Treatments (<i>n</i> = 7)</b> |         |              |                          |              |                           |              |                             |              |                                  |                             |
| Davidoff & Katz (1985)                           | Yes     | Not reported |                          |              | Yes (3/3)                 | Not reported | Yes (1/1)                   | Not reported |                                  |                             |
| Haendiges et al. (1996)                          | Yes     | Yes          | Yes (1/1)                | Yes (1/1)    |                           |              | Yes (3/3)                   | Yes (3/3)    | Yes (1/2)                        | Not reported                |
| Knollman-Porter et al. (2018)                    | Yes     | Not reported | Yes (1/1)                | Not reported |                           |              |                             |              |                                  |                             |
| Mitchum et al. (1995)                            | Yes     | Yes          | Yes (1/1)                | Yes (1/1)    |                           |              | Yes (2/2)                   | Yes (2/2)    | Yes (3/5)                        | Yes (2/5)                   |
| Morris & Franklin (2012)                         | Yes     | Yes          | Yes (1/1)                | Yes (1/1)    | Yes (1/1)                 | No           | Yes (1/2)                   | Yes (1/2)    | Yes (1/4)                        | No (1/1)                    |
| Musso et al. (1999)                              |         |              |                          |              |                           |              | Yes (1/1)                   | Yes (1/1)    |                                  |                             |
| Woolf et al. (2014)                              | Yes     | No           | Yes (1/1)                | Yes (1/1)    | No (0/1)                  |              | Yes (4/4)                   | Yes (2/4)    |                                  |                             |
| <b>Mixed Auditory Treatments (<i>n</i> = 13)</b> |         |              |                          |              |                           |              |                             |              |                                  |                             |
| Archibald et al. (2009)                          |         |              |                          |              | Yes (1/1)                 | Not reported |                             |              | Yes (2/2)                        | Yes (1/2)                   |
| Behrmann & Lieberthal (1989)                     | Yes     | Not reported | Yes (2/2)                | Yes (1/2)    | Yes (1/1)                 | No           | Yes (1/1)                   | Yes (1/1)    | Yes (1/1)                        | No                          |
| Francis et al. (2001)                            | Yes     | Yes          | Yes                      | No           |                           |              |                             |              | No                               |                             |
| Grayson et al. (1997)                            |         |              |                          |              | Yes (1/1)                 | Yes (1/1)    | Yes (3/3)                   | Yes (2/3)    | Yes (4/4)                        | Yes (1/1)<br>3 Not reported |
| Jacobs & Thompson (2000)                         | Yes     | Not reported | Yes (2/2)                | Not reported |                           |              |                             |              | Yes (3/3)                        | Not reported                |
| MacGregor et al. (2015)                          |         |              |                          |              | Yes (2/2)                 | Yes (1/2)    |                             |              | Yes (2/2)                        | 1 Yes<br>1 Not reported     |

| Maneta et al. (2001)               |     |              | No (2/2)  |              | Yes (1/1) | Not reported | No (2/2)  |                             |                           |
|------------------------------------|-----|--------------|-----------|--------------|-----------|--------------|-----------|-----------------------------|---------------------------|
| Munro & Siyamblapitiya (2017)      | Yes | Yes          | Yes (1/1) | Yes (1/1)    | Yes (2/2) | Not reported |           | Yes (3/3)                   | Not reported              |
| Prins et al. (1989)                |     |              |           |              | Yes (1/1) | Yes (1/1)    | Yes (3/3) | Yes (2/2)<br>1 Not reported | Yes (4/4)<br>(1/4)        |
| Raymer et al. (2006)               | Yes | Yes          | Yes (1/1) | Yes (1/1)    | Yes (1/1) | Not reported |           | Yes (4/4)                   | Not reported              |
| Schwartz et al. (1994)             | Yes | Yes          | Yes (1/1) | No           |           |              | Yes (3/3) | Yes (3/3)                   | Yes (4/4)<br>Not reported |
| Thompson et al. (2010)             | Yes | Yes          | Yes (1/1) | Yes (1/1)    | Yes (1/1) | No           |           | Yes (1/1)                   | Yes (1/1)                 |
| Thompson et al. (2003)             | Yes | Not reported | Yes (2/2) | Not reported | Yes (3/3) | Not reported |           | Yes (4/5)                   | Not reported              |
| <b>Indirect Treatments (n = 8)</b> |     |              |           |              |           |              |           |                             |                           |
| Bonakdarpour et al. (2003)         |     |              |           |              | Yes (1/1) | Yes (1/1)    |           |                             |                           |
| Francis et al. (2003)              |     |              |           |              | Yes (1/1) | Yes (1/1)    | Yes (1/1) | Yes (1/1)                   |                           |
| Javadipour et al. (2018)           |     |              |           |              | Yes (1/1) | Not reported | Yes (2/2) | Not reported                |                           |
| Murray et al. (2006)               |     |              |           |              | No (2/2)  |              | No (1/1)  |                             |                           |
| Szelag et al. (2014)               |     |              |           |              | Yes (1/1) | Yes (1/1)    |           |                             |                           |
| Szymaszek et al. (2017)            |     |              |           |              | Yes (1/1) | Yes (1/1)    |           |                             |                           |
| You et al. (2011)                  |     |              |           |              | Yes (1/1) | Yes (1/1)    |           |                             |                           |
| Zakarias (2018)                    |     |              |           |              |           |              | Yes (1/1) | Yes (1/1)                   |                           |

*Note.* AC = auditory comprehension; Improve = Improvement reported for All or Some participants (number of measures showing change/number of measures used); Pos Sig = Positive significance reported for All or Some participants (number of measures with significant change/number of measures used); Not reported = Study authors measured treatment outcome and/or generalization but did not report significance; Indirect treatment blacked out columns = Measurement of treatment outcome (trained stimuli) and Other linguistic measures not appropriate for indirect treatments.
